# Supplementary material for: Evidence for coal forest refugia in the seasonally dry Pennsylvanian tropical lowlands of the Illinois Basin, USA
Source: PeerJ. 2014 Nov 4;2:e630. doi: 10.7717/peerj.630 (PMC4226648; doi:10.7717/peerj.630)
Supplement: Table S1 — Sporomorph count data sample 1 and 2, Cottage Grove plant locality, Cottage Grove Mine, southeast Illinois. [file peerj-02-630-s001.xlsx]

## Sheet: data
				Sporomorph count
			Sporomorph	Sample 1	Sample 2
LYCOPSIDS	Isoetales	Chaloneriaceae	Endosporites globiformis	2	0
			Endosporites sp.	1	0
			Radiizonates tenuis	1	0
			Cristatisporites indignabundus	rare	0
	Lepidodendrales	Diaphorodendraceae	Granasporites medius	6	36
		Lepidocarpaceae	Cadiospora magna	2	1
			Lycospora brevijuga	0	2
			Lycospora brevis	12	0
			Lycospora granulata	66	0
			Lycospora parva	0	2
			Lycospora pellucida	41	0
			Lycospora punctata	6	0
			Lycospora pusilla	69	0
			Lycospora sp. (indet)	61	0
		Lepidodendraceae	Crassispora kosankei	0	7
	Selaginellales	Selaginellaceae	Cirratriradites annulatus	2	0
			Cirratriradites annuliformis	2	1
SPHENOPSIDS	Calamitales	Calamitaceae	Calamospora breviradiata	0	4
			Calamospora microrugosa	0	2
			Calamospora parva	4	2
	Shenophyllales		Laevigatosporites minor	13	4
			Vestispora pseudoreticulata	2	3
FERNS	Filicales		Granulatisporites granulatus	5	2
		Gleicheniaceae	Triquitrites bransonii	14	0
			Triquitrites sculptilis	12	2
		Botryopteridaceae	Microreticulatisporites nobilis	5	1
		Tedeleaceae	Raistrickia fulva	0	1
			Raistrickia irregularis	0	1
			Raistrickia pilosa	3	1
	Marattiales	Marattiaceae	Cyclogranisporites aureus	0	16
			Punctatosporites rotundus	2	0
			Laevigatosporites globosus	0	rare
			Thymospora pseudothiessenii	13	0
		Psaroniaceae	Latosporites minutus	5	0
	Zygopteridales	Zygopteridaceae	Verrucosisporites verrucosis	3	14
	unknown ferns		Deltoidospora levis	0	1
			Deltoidospora ornata	2	1
			Deltoidospora priddyi	0	5
			Deltoidospora tumida	1	0
			Deltoidospora sp.	2	0
			Dictyotriletes mediareticulatus	0	10
			Granulatisporites adnatoides	0	1
			Mooreisporites inusitatus	0	1
			Punctatosporites sp.	5	0
			Verrucosisporites donarii	1	28
CORDAITES	Cordaitanthales	Cordaitanthaceae	Florinites sp.	6	0
			Florinites florinii	4	5
			Florinites mediapudens	46	112
			Florinites pumicosus	9	27
			Florinites visendus	2	7
UNKNOW AFFINITY			cf Punctatisporites	1	0
			Cheiledonites sp.	1	0
			Cuneisporites rigidus	1	0
			Total	433	300
